# Supplementary material
Source: Springer Nature journal article supplement (https://www.springermedizin.de/resource/supplementary/13014_2014_1146_MOESM6_ESM.pdf/9634998)

**A**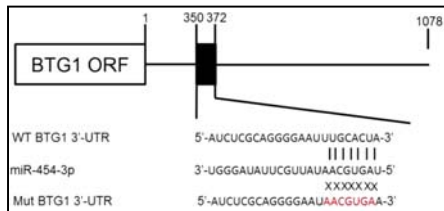**B**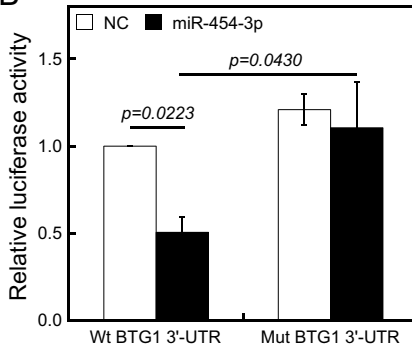**C**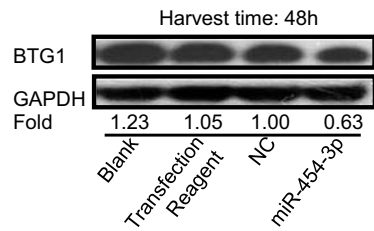**D**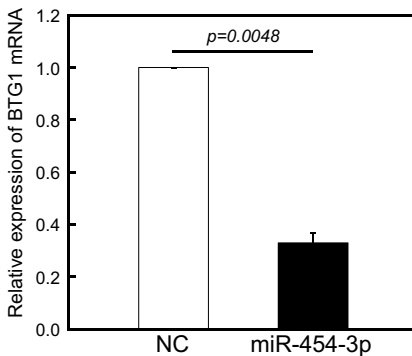**E**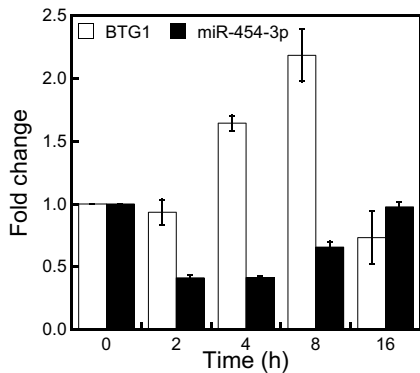**F**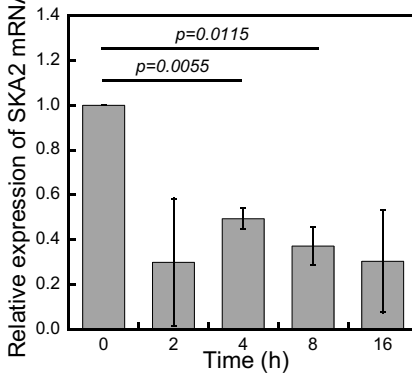

Supplement: MOESM6 [file 9634998]
